# Supplementary material for: A field-induced hole generation layer for high performance alternating current polymer electroluminescence and its application to extremely flexible devices
Source: Royal Society of Chemistry journal article supplement (doi:10.1039/c6tc00247a), 2016-01-01
Supplement: c6tc00247a1.pdf [file c6tc00247a1.pdf]

Electronic Supplementary Material (ESI) for Journal of Materials Chemistry C.  
This journal is © The Royal Society of Chemistry 2016

## Supporting Information

### **Field-induced Hole Generation Layer for High Performance Alternating Current Polymer Electroluminescence and its Application to Extremely Flexible Devices**

Ju Han Lee, Sung Hwan Cho, Richard Hahnkee Kim, Beomjin Jeong, Sun Kak Hwang, Ihn Hwang, Kang Lib Kim, Eui Hyuk Kim, Tae-Woo Lee and Cheolmin Park\*

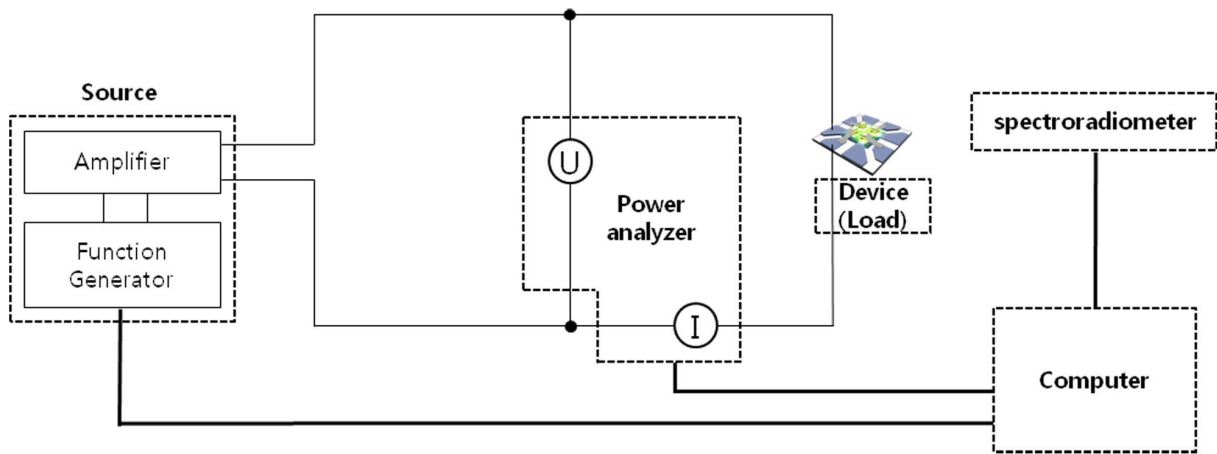

**Figure S1.** A schematic diagram of electric characteristics measurement system.

**a** SiO<sub>2</sub>/EML

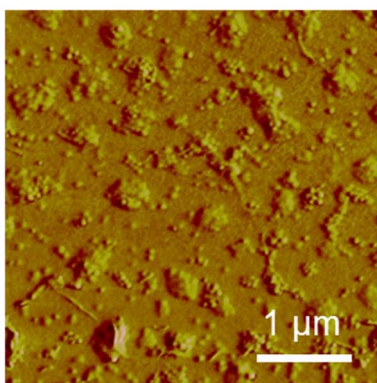

**b** SiO<sub>2</sub>/PEDOT:PSS

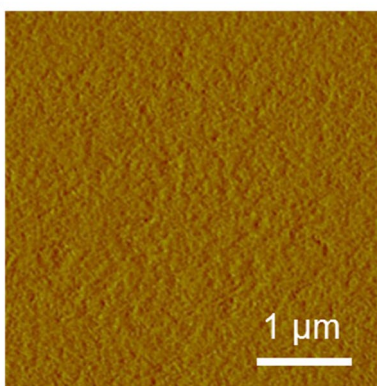

**c** SiO<sub>2</sub>/PEDOT:PSS/EML

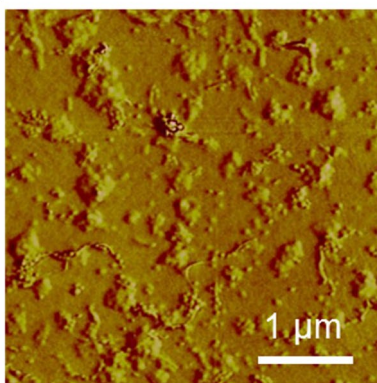

**Figure S2.** Atomic force microscopy (AFM) images of (a) an EML on SiO<sub>2</sub>, (b) a PEDOT:PSS on SiO<sub>2</sub>, (c) an EML on PEDOT:PSS/SiO<sub>2</sub>.

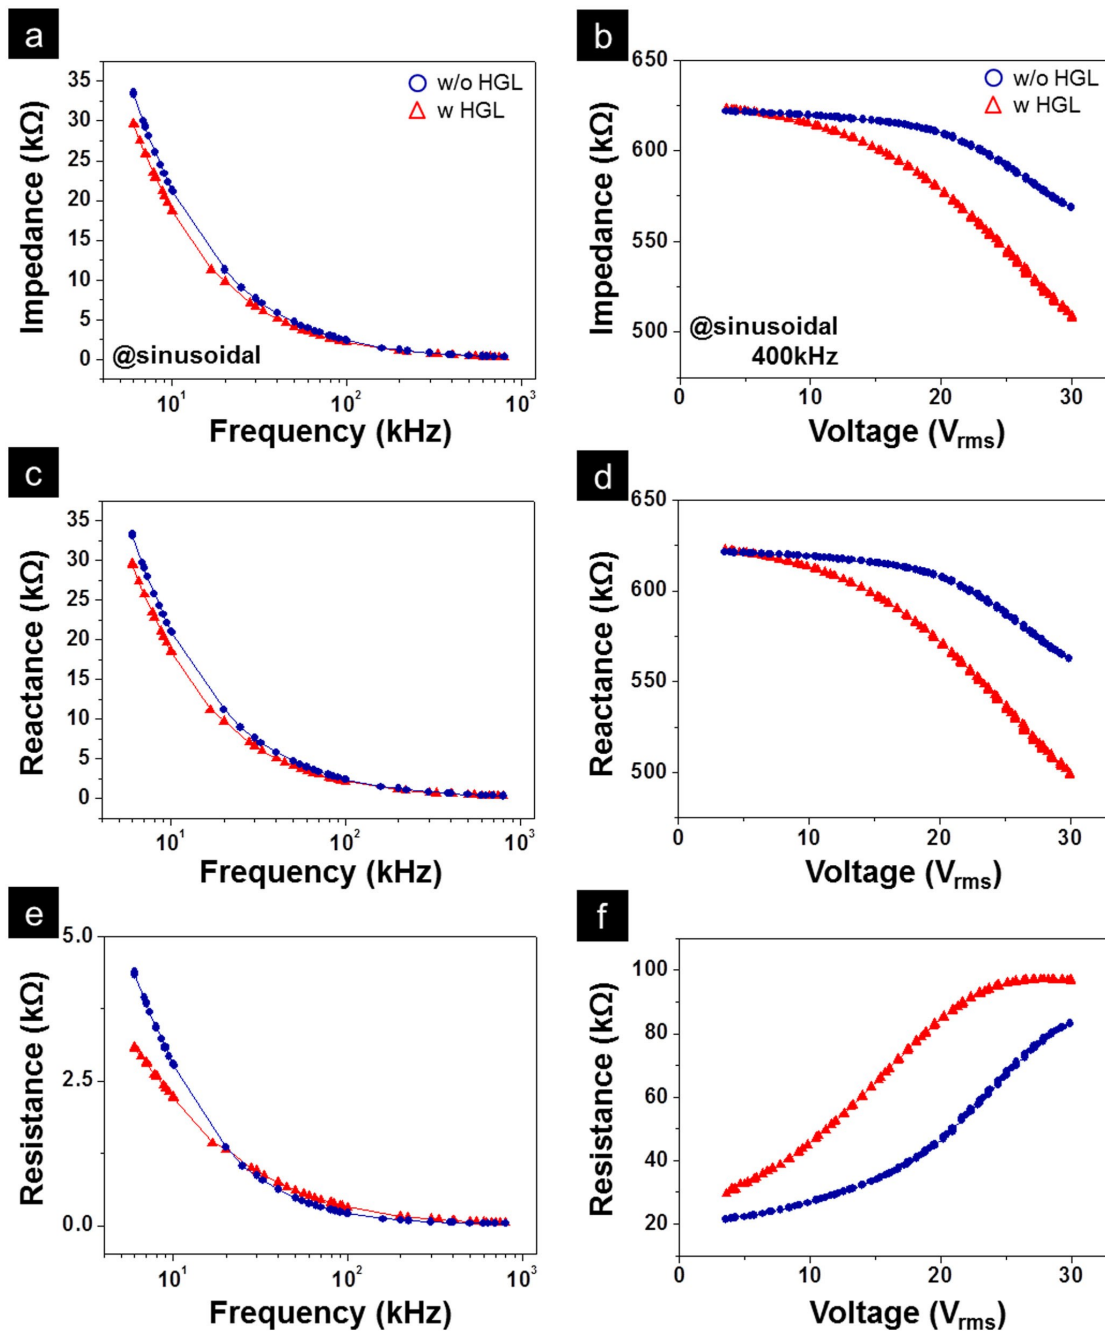

**Figure S3.** The electric characteristics of AC-PEL devices with and without PEDOT:PSS HGL including impedance, reactance and resistance. (a), (c), (e) Plots as a function of frequency. (b), (d), (f) Plots as a function of voltage at 400 kHz.

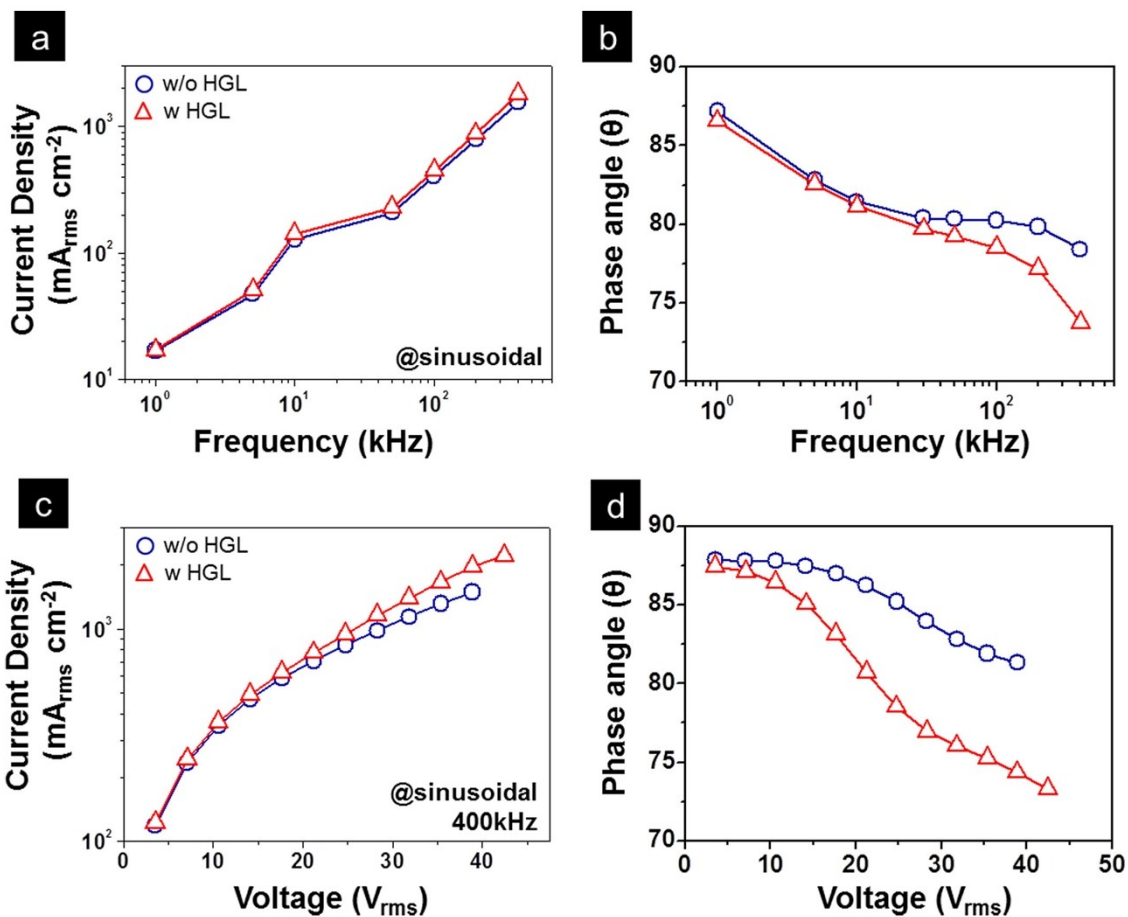

**Figure S4.** The characteristics of AC-PEL devices with and without PEDOT:PSS HGL. (a) AC current density and (b) phase angle as a function of frequency at a bias voltage of 35 V<sub>rms</sub>. (c) AC current density and (d) phase angle as a function of voltage at 400 kHz.

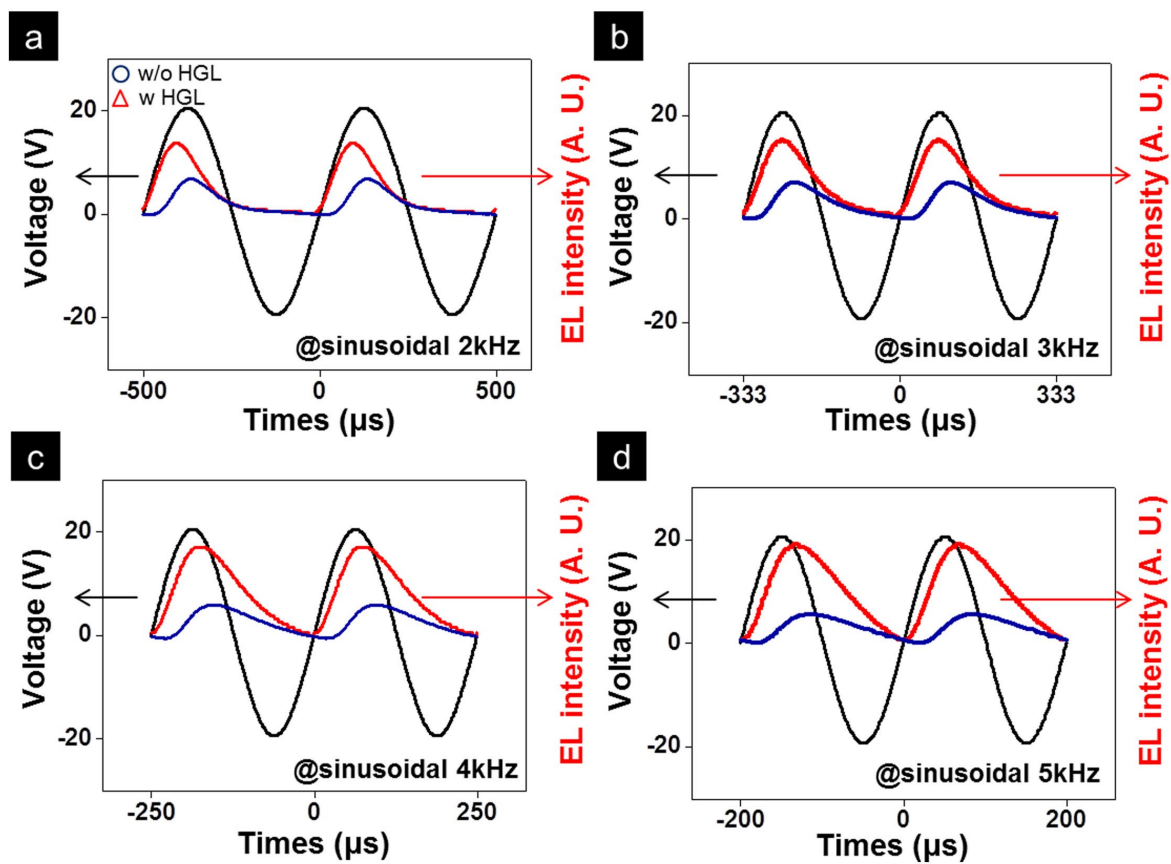

**Figure S5.** The time-resolved EL signals of AC-PEL devices with and without PEDOT:PSS HGL with the voltage amplitude of  $\pm 20$  V along sinusoidal frequency.

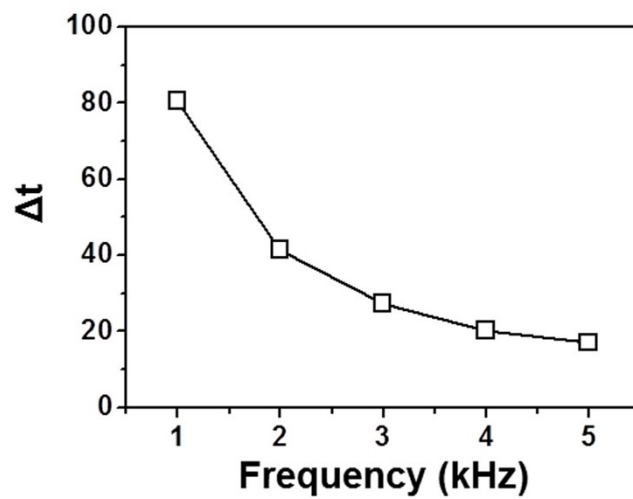

**Figure S6.** A plot of  $\Delta t$  as a function of applied frequency.  $\Delta t$  was determined by the time difference between two devices at their maximum EL.

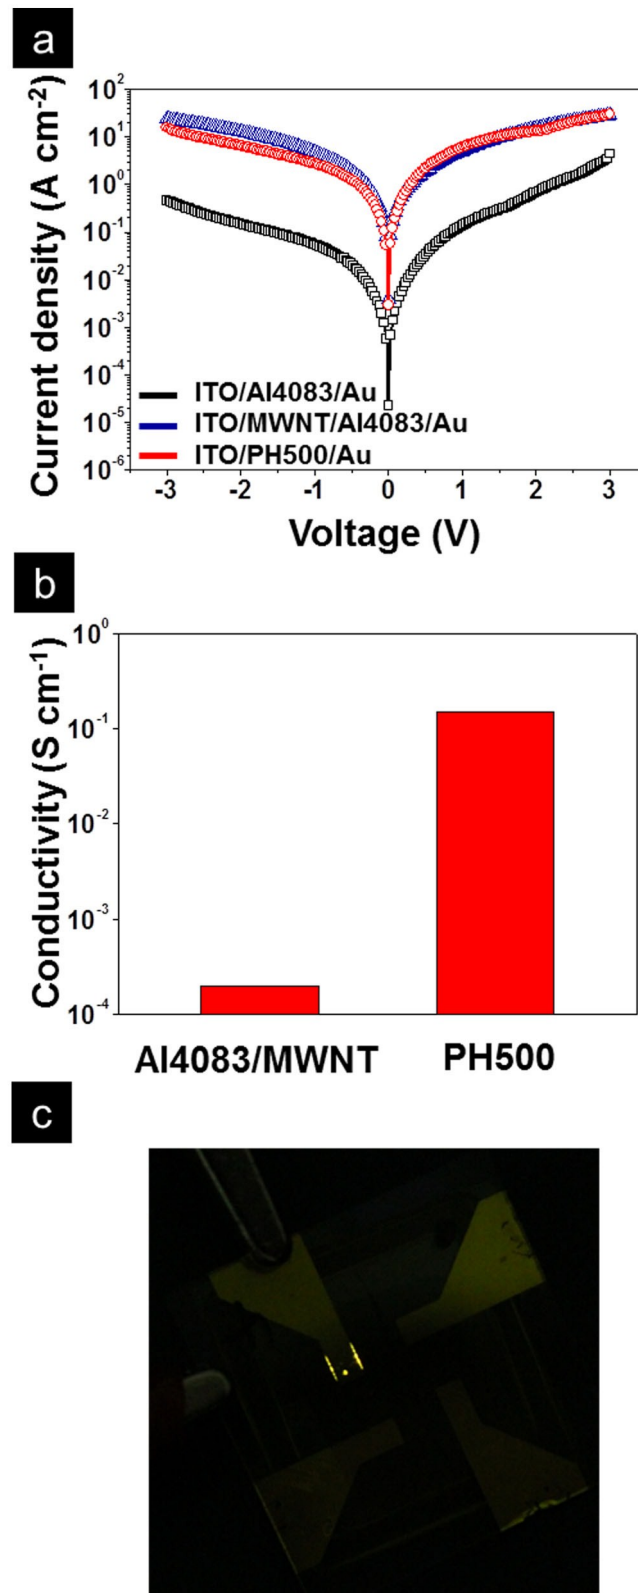

**Figure S7.** (a) I-V characteristics of a PEDOT:PSS (AI 4083), a doped PEDOT:PSS (AI 4083) and PH500. (b) Typical conductivity of samples by 4-point probe measurements. (c) A photograph of an AC-PEL with PH500.



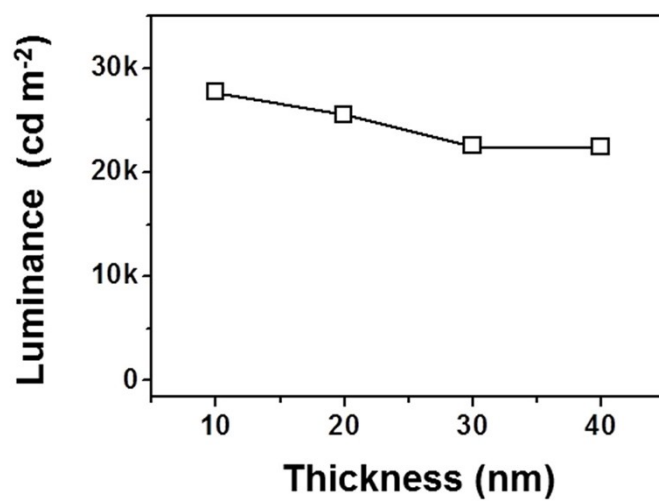

**Figure S8.** Luminance intensities of AC-PEL devices with PEDOT:PSS HGL on PEDOT:PSS thickness.

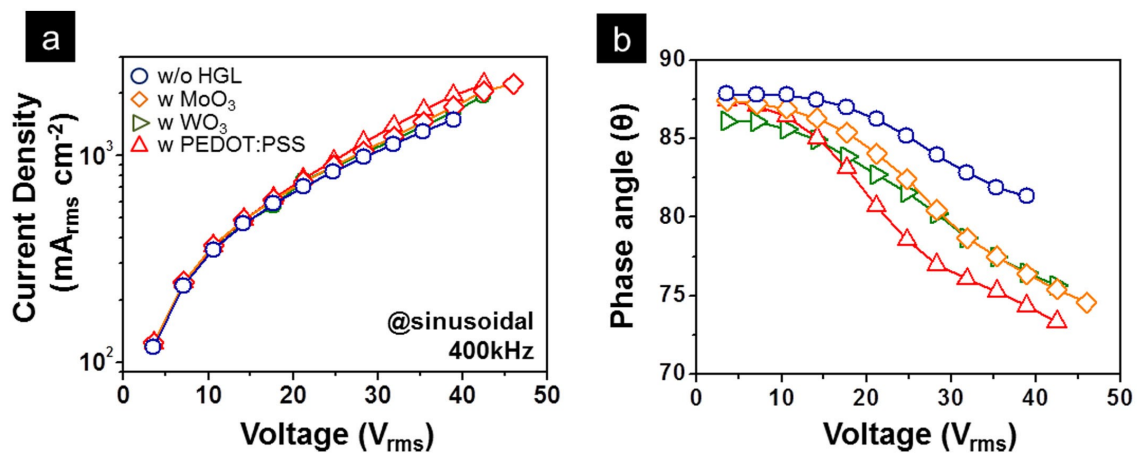

**Figure S9.** The characteristics of AC-PEL devices with various HGLs such as PEDOT:PSS, MoO<sub>3</sub> and WO<sub>3</sub>. (a) AC current density and (b) phase angle as a function of applied voltage at 400 kHz.

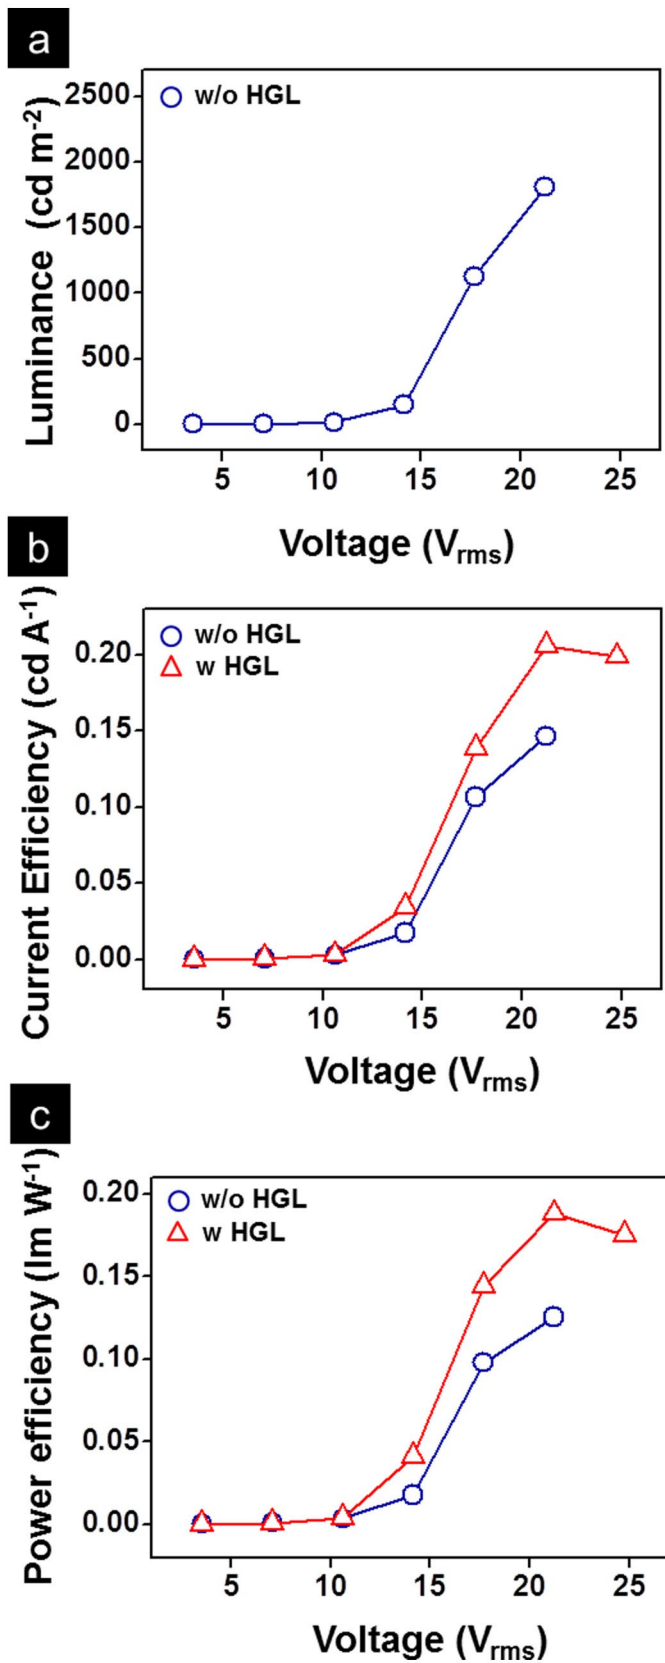

**Figure S10.** (a) Luminance-voltage behavior of flexible AC-PEL devices without a PEDOT:PSS HGL. (b) Current and (c) power efficiency of flexible AC-PEL devices with and without PEDOT:PSS.
